1 Altered directed functional connectivity of the right amygdala in depression: high-density EEG  
2 study

3 Alena Damborská<sup>1,2,3 a \*</sup>, Eliška Honzirková<sup>2</sup>, Richard Barteček<sup>2,3</sup>, Jana Hořínková<sup>2,3</sup>, Sylvie  
4 Fedorová<sup>2,3</sup>, Šimon Ondruš<sup>2,3</sup>, Christoph M. Michel<sup>1,4</sup>, Maria Rubega<sup>1a,b</sup>

5 <sup>1</sup>Department of Basic Neurosciences, University of Geneva, Campus Biotech, Geneva,  
6 Switzerland

7 <sup>2</sup>Department of Psychiatry, Faculty of Medicine, Masaryk University, Brno, Czech Republic

8 <sup>3</sup>Department of Psychiatry, University Hospital Brno, Brno, Czech Republic

9 <sup>4</sup>Lemanic Biomedical Imaging Centre (CIBM), Lausanne and Geneva, Switzerland

10 <sup>a</sup>these authors contributed equally to this work

11 <sup>b</sup>present address: Department of Neuroscience, University of Padova, Padova, Italy

12 \* Correspondence:

13 Alena Damborská

14 [adambor@med.muni.cz](mailto:adambor@med.muni.cz)

15

16 The cortico-striatal-pallidal-thalamic and limbic circuits are suggested to play a crucial role in  
17 the pathophysiology of depression. Stimulation of deep brain targets might improve  
18 symptoms in treatment-resistant depression. However, a better understanding of  
19 connectivity properties of deep brain structures potentially implicated in deep brain  
20 stimulation (DBS) treatment is needed. Using high-density EEG, we explored the directed  
21 functional connectivity at rest in 25 healthy subjects and 26 patients with moderate to severe  
22 depression within the bipolar affective disorder, depressive episode, and recurrent  
23 depressive disorder. We computed the Partial Directed Coherence on the source EEG signals  
24 focusing on the amygdala, anterior cingulate, putamen, pallidum, caudate, and thalamus. The  
25 global efficiency for the whole brain and the local efficiency, clustering coefficient, outflow,  
26 and strength for the selected structures were calculated. In the right amygdala, all the  
27 network metrics were significantly higher ( $p < 0.001$ ) in patients than in controls. The global  
28 efficiency was significantly higher ( $p < 0.05$ ) in patients than in controls, showed no correlation  
29 with status of depression, but decreased with increasing medication intake ( $R^2 =$   
30  $0.59$  and  $p = 1.52e - 05$ ). The amygdala seems to play an important role in neurobiology of

31 depression. Practical treatment studies would be necessary to assess the amygdala as a  
32 potential future DBS target for treating depression.

33

34 Affective disorders belong to the most common and most serious psychiatric disorders <sup>1</sup>. A  
35 crucial role of the cortico-striatal-pallidal-thalamic and limbic circuits in the neurobiology of  
36 depression was repeatedly reported <sup>2 3 4</sup>. Magnetic resonance imaging, functional magnetic  
37 resonance imaging (fMRI), magnetoencephalographic, and electroencephalographic (EEG)  
38 studies have confirmed that depressive patients show structural impairments and functional  
39 disbalances of brain networks that involve structures engaged in a) emotions, i.e. amygdala,  
40 subgenual anterior cingulate, caudate, putamen and pallidum <sup>5 3 6 7 8 9 10 11 12</sup>; b) self-referential  
41 processes, i.e. medial prefrontal cortex, precuneus, and posterior cingulate cortex <sup>13 14</sup>; c)  
42 memory, i.e. hippocampus, parahippocampal cortex <sup>15</sup>; d) visual processing, i.e. fusiform  
43 gyrus, lingual gyrus, and lateral temporal cortex <sup>16</sup>; and e) attention, i.e. dorsolateral prefrontal  
44 cortex, anterior cingulate cortex (ACC), thalamus, and insula <sup>17 10 11 12</sup>. Moreover, post-mortem  
45 morphometric measurements revealed smaller volumes of the hypothalamus, pallidum,  
46 putamen and thalamus in patients with affective disorders <sup>18</sup>.

47 Many depressive patients fail to respond to pharmacological therapy resulting in 1 – 3%  
48 prevalence of treatment-resistant depression (TRD) <sup>19</sup>. One of the newest therapeutic  
49 approaches for TRD is an invasive direct electrical stimulation of relevant deep brain structures  
50 <sup>20</sup>. Both unipolar and bipolar depression patients might benefit from deep brain stimulation  
51 (DBS) treatment <sup>21</sup>, although an optimal approach, including selection of an optimal target  
52 structure, has yet to be established. Selection of the brain structures, that are currently being  
53 tested as DBS targets for treating depression <sup>20</sup>, is mostly supported with the evidence from  
54 lesional <sup>22 23</sup>, animal <sup>24 25 26 27 28 29 30</sup>, and neuroimaging <sup>31 32 33 34 35 36 37 38</sup> studies. The latter  
55 approach provides evidence from a network perspective <sup>39 40</sup> showing dysbalances in the  
56 intrinsic functional architecture of the brain. During a resting state, patients with depression as  
57 compared to healthy controls show hyperconnectivity within the default mode network <sup>13 33 38</sup>,  
58 hypoconnectivity within the frontoparietal network <sup>41 42</sup>, hyperconnectivity between the  
59 default mode and frontoparietal networks <sup>43</sup>, and dysbalances in connectivity within the  
60 salience <sup>44 45</sup> and dorsal attention <sup>46</sup> networks. Functional connectivity anomalies between the  
61 hippocampus, cortical and subcortical regions <sup>47</sup> similar to those observed in humans with  
62 depression, were also observed in a genetic rat model of major depression. The

63 pathophysiological basis of depression, however, still remains incompletely understood.  
64 Particularly, better understanding of the connectivity properties of deep brain structures  
65 potentially implicated in DBS treatment could have an important value.

66 Neuroimaging techniques, such as fMRI and EEG, allow to investigate the integration of  
67 functionally specialized brain regions in a network. Inferring the dynamical interactions among  
68 simultaneously recorded brain signals can reveal useful information in abnormal connectivity  
69 patterns due to pathologies.

70 The connectivity studies based on fMRI are usually based on correlation analyses without  
71 providing knowledge about the direction of the information flow between the examined  
72 regions. Understanding the directionality is, however, crucial when searching for suitable DBS  
73 targets for treating TRD, because the antidepressant effect of DBS treatment might be caused  
74 by changes in the activity of remote structures that receive inputs from the stimulated region.  
75 For example, it has been hypothesized that DBS applied in the nucleus accumbens might  
76 influence the activity in the ventral (subgenual ACC, orbitofrontal and insular cortices) and  
77 dorsal (dorsal ACC, prefrontal and premotor cortices) subnetworks of the depression  
78 neurocircuitry<sup>48</sup>. Causal link between a functional inhibition of the lateral habenula and  
79 reduction of the default mode network hyperconnectivity was shown on a rat model of  
80 depression<sup>30</sup>, which might explain the therapeutic effect of the lateral habenula DBS in TRD  
81 patients<sup>49</sup>. In other words, the functional inhibition of a deep brain structure via DBS might  
82 cure depression through reduction of the hyperconnectivity in the large-scale brain network.  
83 Another example of a particular role of the stimulated structure in the large-scale neural  
84 communication is the ACC, whose possible integrative role in cognitive processing<sup>50 51</sup> might  
85 explain the most recently reported high efficacy of DBS to subgenual ACC in treating  
86 depression<sup>52</sup>.

87 The growing interest in investigating the dynamical causal interactions that characterize  
88 resting-state or task-related brain networks has increased the use of adaptive estimation  
89 algorithms during recent years. Particularly, Granger causality based on adaptive filtering  
90 algorithms is a well suited procedure to study dynamical networks consisting of highly non-  
91 stationary neural signals such as EEG signals<sup>53 54</sup>. The adaptive filtering enables to deal with  
92 time-varying multivariate time-series and test direct causal links among brain regions. A signal  
93  $x$  is said to Granger-cause another signal  $y$  if the history of  $x$  contains information that helps  
94 to predict  $y$  above and beyond the information contained in the history of  $y$  alone<sup>55</sup>.

95 Aberrant functional EEG-based connectivity in depressive patients was reported in studies  
96 where network metrics were computed directly between sensor recordings<sup>56 57 58 59 60 61</sup>. Since  
97 each EEG channel is a linear mixture of simultaneously active neural and other  
98 electrophysiological sources, whose activities are volume conducted to the scalp electrodes,  
99 the utility of such observations on the sensor level is limited<sup>62 63</sup>. This limitation is particularly  
100 remarkable in connectivity studies which aim to identify the real active relations between brain  
101 regions. Connectivity analysis performed in the source space enables to partially overcome this  
102 issue<sup>62</sup>. Indeed, Partial Directed Coherence estimators do not take into account zero-lag  
103 interactions that describe the instantaneous propagation of activity, considering the zero-phase  
104 connectivity as noise added to lagged connectivity patterns of interest. For this reason, directed  
105 functional connectivity analysis based on electrical source imaging proved to be a promising  
106 tool to study the dynamics of spontaneous brain activity in healthy subjects and in various brain  
107 disorders<sup>64 65 66</sup>. Despite this fact, the electromagnetic imaging has not been yet used in patients  
108 with depression to study the directed connectivity of resting-state networks.

109 In the current study, we explored the directed functional connectivity at rest in depression using  
110 high-density EEG. We computed the Partial Directed Coherence on the source EEG signals  
111 focusing on the role of the amygdala, anterior cingulate, putamen, pallidum, caudate, and  
112 thalamus in large-scale brain network activities. We hypothesized that the resting-state directed  
113 functional connectivity in these deep brain structures might be disrupted in patients with  
114 depression compared to healthy controls.

115

## 116 **Results**

117 In line with the aim of the study we focused on resting-state electrophysiological activity of  
118 twelve regions of interest (ROIs) of selected deep brain structures. Further details on results on  
119 the ROIs of the whole brain are reported in the Supplementary Information.

120 **Power spectra.** We found an overall increase in power in theta and alpha frequency bands in  
121 patients compared to controls at both the *population* and *single-subject* levels. At the  
122 *population* level, significantly higher power ( $p < 0.05$ ) in patients was found in all investigated  
123 subcortical regions in both frequency bands (see Figure 1). At the *single-subject* level, a  
124 significantly higher power ( $p < 0.05$ ) in patients than in controls was observed in the [4-12] Hz  
125 frequency range bilaterally in the thalamus, pallidum, putamen, and caudate. Moreover, a

126 significant left-lateralized power increase ( $p < 0.05$ ) in patients vs controls was observed in the  
127 anterior cingulate and amygdala in this frequency range (see Figure 2b).

128 We found a significantly decreased power in delta [1-4] Hz and beta [12-18] Hz frequency  
129 bands in patients compared to controls in all investigated ROIs, when evaluating the results at  
130 the *population* level (Figure 1). At the *single-subject* level, delta power was significantly  
131 decreased in patients vs controls in the right caudate, putamen, and pallidum (Figure 2a). There  
132 was no significant difference in beta power between the two groups in any investigated ROI at  
133 the *single-subject* level (see Figure 2c).

134 **Network metrics.** The connectivity network measures that we performed in the [4-12] Hz  
135 frequency range, showed increased values in patients compared to controls at both levels. At  
136 the *population* level, the local efficiency measured in patients was higher than in controls in all  
137 examined subcortical ROIs (see Figure 3). At the *single-subject* level, the global efficiency was  
138 significantly higher ( $p < 0.05$ ) in patients (mean  $\pm$  standard deviation:  $0.0129 \pm 0.0021$ ) than in  
139 controls (mean  $\pm$  standard deviation:  $0.0126 \pm 0.0019$ ). Considering all brain regions, the local  
140 efficiency tended to be higher in patients compared to controls (see Supplementary Fig. S2  
141 online) but the significant differences corresponded only to the right precentral, amygdala and  
142 caudate regions ( $p < 0.05$ ). We observed significant correlations between the local efficiency  
143 and power in the [4-12] Hz frequency range in subcortical ROIs but it was not generalized  
144 among all twelve subcortical ROIs (see Supplementary Fig. S3 online). No significant  
145 correlations were found between the local efficiency and power in delta and beta bands. All the  
146 network measures computed on the twelve selected ROIs showed significantly higher values  
147 in patients than in controls in the right amygdala. The strength, local efficiency, and clustering  
148 coefficient of the right caudate were significantly higher in patients than controls, while there  
149 was no significant difference between the groups in the outflow from this ROI. There were no  
150 significant differences in any network metric in the anterior cingulate, thalamus, pallidum, or  
151 putamen (see Figure 4).

152 There were no statistical differences in the network metrics estimated between the left and right  
153 hemisphere in each subject. The laterality indices showed that neither controls, nor patients had  
154 a lateralization in connectivity results of the six investigated deep brain structures. No  
155 significant differences in the laterality indices were observed comparing controls and patients.

156 **Effect of medication on network impairments.** We found no correlation of the connectivity  
157 results with the intake of benzodiazepines, while there was a significant relationship between

158 the global efficiency as predictor of the intake of AD/AP/MS medication ( $AD/AP/MS \sim 1 +$   
159  $GE + GE^2$ ; Root Mean Squared Error: 0.716;  $R^2 = 0.59$ ; F-statistic vs. constant model:  
160 18.7,  $p = 1.52e - 05$ ). The global efficiency decreased with increasing medication score (see  
161 Figure 5). We observed no significant correlation ( $R^2 < 0.05$  and  $p > 0.8$ ) between the  
162 connectivity results and any of the parameters that describe the status of depression (MADRS  
163 score, CGI score, illness duration, and the number of episodes) or the demographic profile (age  
164 and education level).

165

166 Figure 1

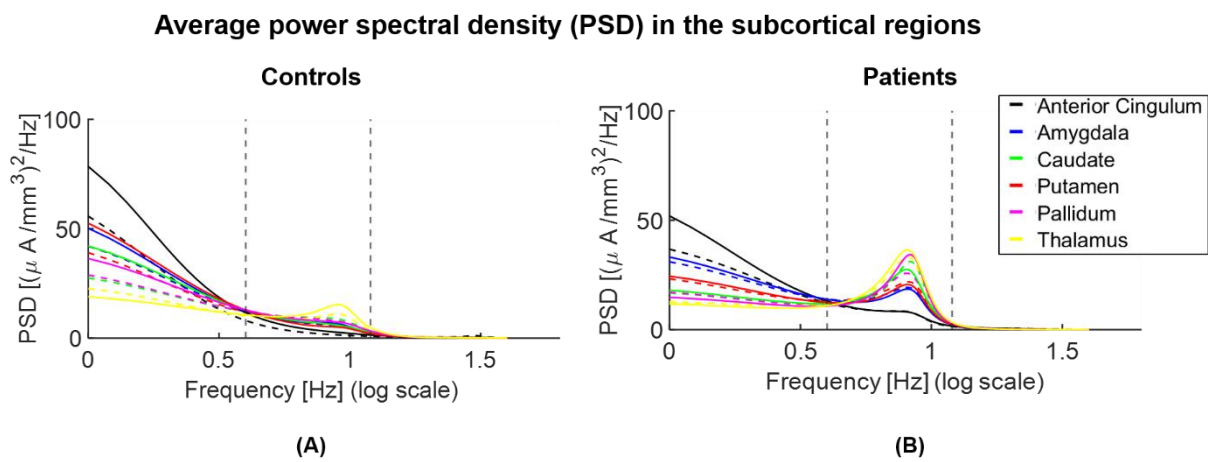

167

168

169 Figure 2

170

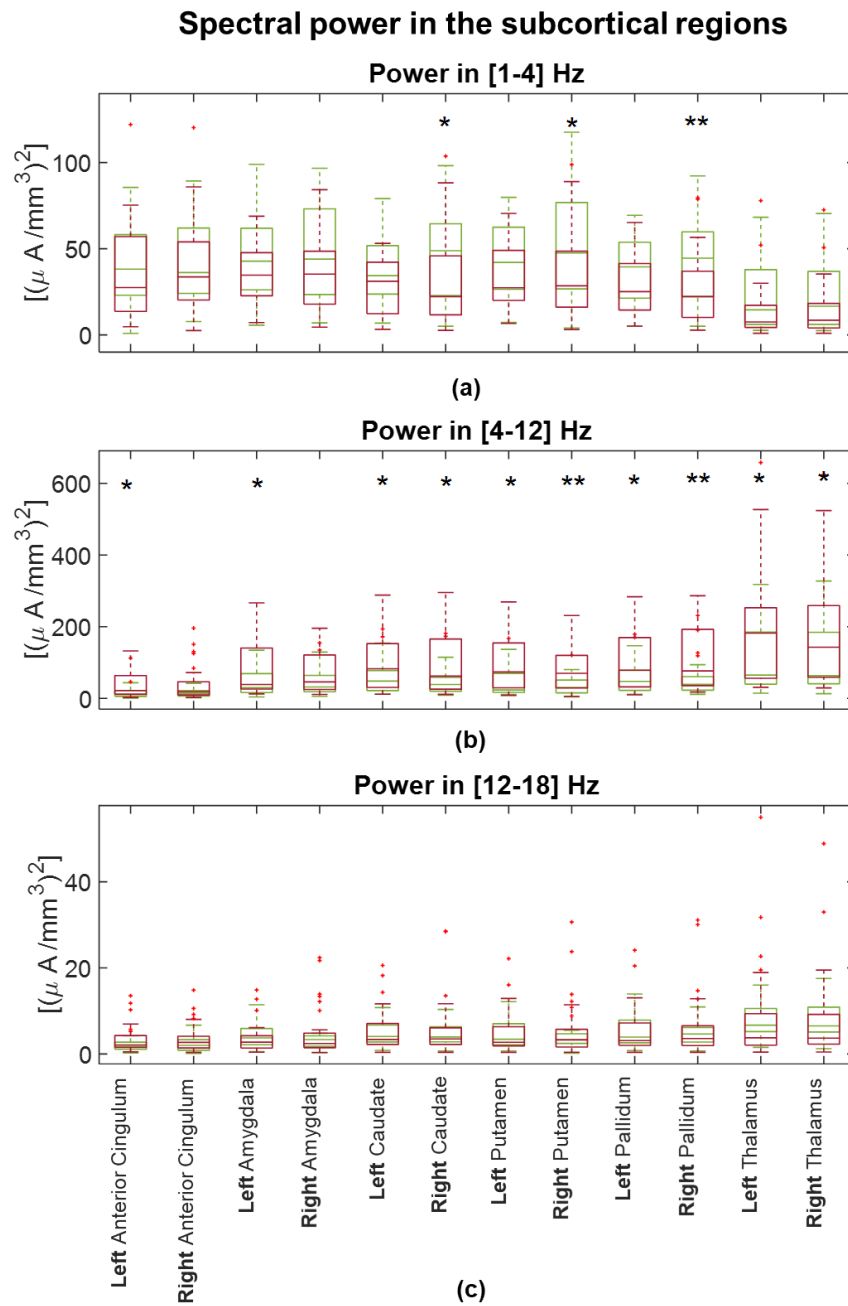

171

172

173

174

175

176

177 Figure 3

**Average local efficiency in the subcortical regions in [4-12] Hz**

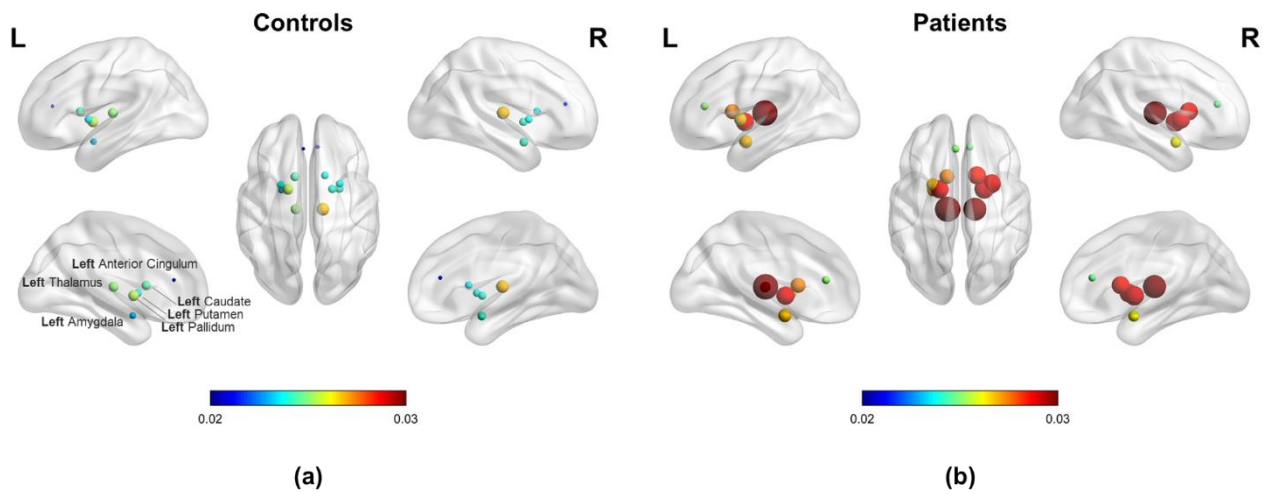

178

179

180 Figure 4

**Network metrics in the subcortical regions in [4-12] Hz**

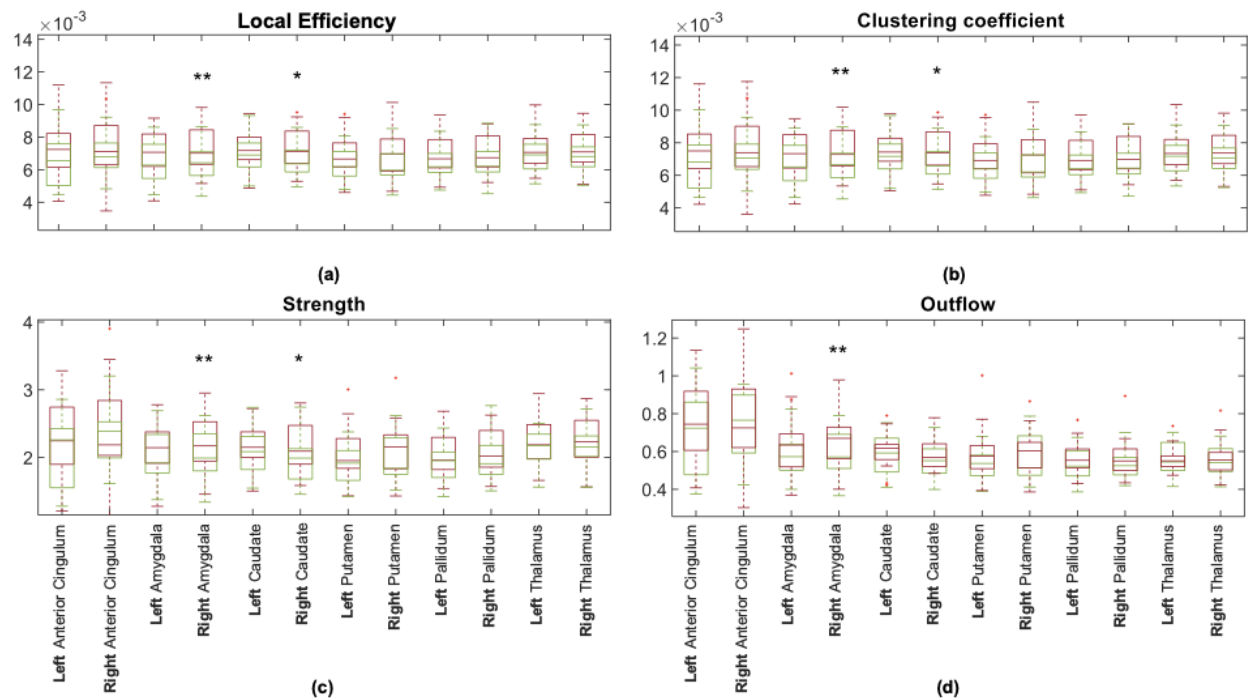

181



182 Figure 5

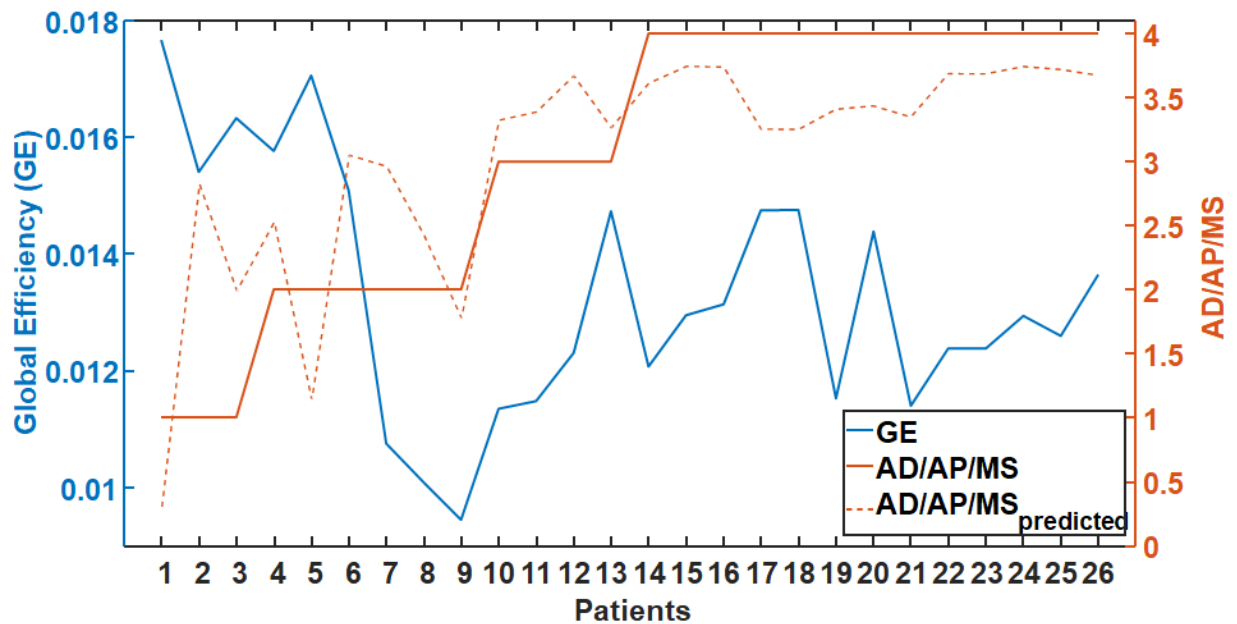

183

## 184 Discussion

185 In this study, we investigated resting-state network alterations using iPDC on source signals of  
186 high-density EEG in patients with depression compared to healthy controls. We explored the  
187 directed functional connectivity of the amygdala, anterior cingulate, putamen, pallidum,  
188 caudate, and thalamus, among them and with all the other brain regions in the time and  
189 frequency domain. We exploited the Kalman filter algorithm<sup>67</sup> assuming that resting state EEG  
190 segments were multiple realizations of the same process. Although we collapsed the temporal  
191 dimension to evaluate the network metrics, we decided to use a time-varying adaptive  
192 algorithm instead of a stationary autoregressive model to take into account the possible non-  
193 stationarity of the EEG signal and to more accurately capture this variability before collapsing  
194 the time with a summary measure, e.g., the median.

195 To sum up, we demonstrated that in patients with moderate to severe depression: (1) the  
196 directed functional connectivity was significantly increased compared to controls in the right  
197 amygdala and the right caudate; (2) the power in theta and alpha frequency bands was  
198 significantly increased compared to controls in all investigated brain anatomical structures; (3)  
199 higher medication intake was associated with lower overall driving from the investigated  
200 regions.

201 **Increased right amygdala directed functional connectivity in depression.** The most robust  
202 finding in our study was an abnormally increased directed functional connectivity in the right

203 amygdala during resting-state in depressive patients. Even though the left-right asymmetry was  
204 not demonstrated by the laterality indices, a right-lateralized hyper-connectivity, as revealed  
205 with all the computed network metrics, was observed in the amygdala. We observed an increase  
206 in outgoing connections from the right amygdala as reflected with significantly higher outflow  
207 and strength in patients compared to controls. Moreover, we found a hyper-connectivity in the  
208 local networks of the right amygdala as reflected with significantly higher local efficiency and  
209 clustering coefficient in patients compared to controls.

210 We also found a significantly higher global efficiency in patients compared to healthy controls.  
211 This network feature had the same trend at the population level. Namely, we observed  
212 abnormally increased local efficiency of all examined deep brain structures in depressive  
213 patients. The efficiency measures the ability of a neural network to integrate and combine  
214 information. The deeper regions have a key role as hubs of the large-scale brain networks, so  
215 changes in their local connectivity properties might have also led to connectivity changes in  
216 the whole brain.

217 The amygdala is involved in processing salient stimuli<sup>68 69</sup> and has been implicated as one of  
218 the central hubs within the affective salience network<sup>70 71 72</sup>. There is converging evidence  
219 from the neuroimaging studies that points to an abnormally increased connectivity and  
220 heightened activation of the amygdala in major depressive disorder (MDD) patients<sup>73 74</sup>,  
221 Reduced connectivity<sup>75 76</sup> and anomalous subregional functional resting-state connectivity of  
222 the amygdala<sup>77</sup> were also reported. Distinct network dysfunctions in MDD were suggested to  
223 underlie adult-specific amygdala resting-state fMRI connectivity impairment within the  
224 affective network, presumably reflecting an emotional dysregulation in MDD<sup>76</sup>.  
225 Hyperconnectivity between the amygdala, default mode network and salience network was also  
226 found to be related to depressive symptoms suggesting to underlie the poststroke depression in  
227 temporal lobe lesions<sup>78</sup>. Unfortunately, the directionality of connections, which might be of  
228 interest when considering a structure as a potential DBS-target for treatment of TRD, cannot  
229 be inferred from these functional studies. There are only rare EEG-based connectivity studies  
230 focusing on depressive symptoms<sup>58 59 60 79</sup> that are, however, conducted only on a non-clinical  
231 population<sup>79</sup> or with connectivity parameters calculated at the sensor level<sup>57 58 59 60 61</sup>. Authors  
232 of one of these studies<sup>79</sup> suggested an inability of the left dorsolateral prefrontal cortex to  
233 modulate the activation of the left temporal lobe structures to be a crucial condition for  
234 ruminative tendencies. Interestingly, in the current study we demonstrated an abnormal  
235 increase in directed functional connectivity arising from the right amygdala. This increased

236 connectivity in depressive patients could reflect an abnormal functioning of the right amygdala.  
237 Such dysfunction might represent an impaired bottom-up signaling for top-down cortical  
238 modulation of limbic regions, leading to an abnormal affect regulation in depressive patients.

239 The increased functional connectivity in amygdala is likely related to structural changes  
240 observed in depression. Enlarged amygdala volumes was found in first-episode depressive  
241 patients that positively correlated with severity of depression <sup>80</sup>. Higher grey matter volume  
242 was detected in bilateral amygdala of TRD patients compared to non-TRD patients, irrespective  
243 whether the patients presented bipolar or unipolar features and was suggested to reflect  
244 vulnerability to chronicity, revealed by medication resistance <sup>81</sup>. Larger right amygdala volume  
245 was, however, also suggested to be associated with greater chances of remission in bipolar  
246 disorder <sup>82</sup>.

247 In our study we aimed to investigate the directed functional connectivity in amygdala to  
248 provide knowledge on neurobiology of depression that is needed to evaluate this structure as a  
249 possible candidate for DBS treatment in depression. Despite myriad of DBS targets for treating  
250 depression tested in humans <sup>20</sup>, the amygdala is not among them. The possible safety and utility  
251 of DBS in the amygdala could only be inferred from studies, in which the amygdala-DBS was  
252 performed for other neuropsychiatric diagnoses, such as epilepsy <sup>83 84 85 86</sup>, post-traumatic stress  
253 disorder <sup>87 88</sup>, and autism <sup>89</sup>. In one of these studies transient stimulation-related positive shift  
254 in mood was observed <sup>84</sup>. Particularly, the stimulation of the right amygdala induced a transient  
255 decrease in the negative affective bias, i.e. the tendency to interpret ambiguous or positive  
256 events as relatively negative. In this case study, an epileptic patient with MDD rated the  
257 emotional facial expressions as more positive with stimulation than without. The stimulation  
258 effect might have been associated with a transient normalization of likely impaired function of  
259 the right amygdala in that patient. We can only speculate, whether this dysfunction was in terms  
260 of hyper-connectivity similar to that observed in our study and whether it was temporally  
261 decreased by inhibitory effect of the stimulation.

262 **Increased right caudate directed functional connectivity in depression.** We demonstrated  
263 that during resting state, patients had significantly higher right caudate directed functional  
264 connectivity than healthy controls. Despite no significant difference between groups in the  
265 caudate outflow, we observed an abnormally increased strength of outgoing connections from  
266 the right caudate in patients. Moreover, we found a hyper-connectivity in the local networks of  
267 the right caudate as reflected with significantly higher local efficiency and clustering  
268 coefficient in patients compared to controls. Caudate hyperactivation and increased caudate-

269 amygdala and caudate-hippocampus fMRI connectivity during stress was previously reported  
270 in remitted individuals with recurrent depression <sup>90</sup>. The here observed EEG-based functional  
271 caudate hyperconnectivity suggests striatal dysfunction even during resting-state in depressed  
272 patients. Our finding is consistent with a compelling evidence directly associating cortico-basal  
273 ganglia functional abnormalities with primary bipolar and unipolar spectrum disorders <sup>91</sup>.  
274 Deficits in resting-state default-mode network connectivity with the bilateral caudate were  
275 suggested to be an early manifestation of MDD <sup>92</sup>. Reduced grey matter volume in the bilateral  
276 caudate <sup>93 94 95 12</sup>, diffusion tensor imaging-based hypoconnectivity between the right caudate  
277 and middle frontal gyrus <sup>96</sup>, and altered functional connectivity of the right caudate with the  
278 frontal regions <sup>94</sup> was observed in MDD patients. In a post-mortem morphometric study in late-  
279 life depressive subjects, reduction in neuronal density was found in both the dorsolateral and  
280 ventromedial areas of the caudate nucleus <sup>97</sup>. Associations between increased white matter  
281 lesion volumes and a decreased right caudate volume in the late-life depression was reported  
282 <sup>98</sup>. In mild to moderately depressed patients no change in caudate gray matter volumes were  
283 found <sup>99</sup> suggesting inverse correlation between the caudate volume and severity of depression.  
284 We found no significant differences in any network metric in the putamen, pallidum, thalamus,  
285 and anterior cingulate. It is possible, however, that examining these structures as a whole might  
286 be insensitive to different changes in their relevant subregions. Only the medial part of the  
287 thalamus is expected to play a role in the experience of affect <sup>73 100</sup>. Reduced activity in the  
288 dorsal ACC but increased activity in the subgenual ACC have been found in acute depression  
289 in functional imaging studies <sup>101 102</sup>. Moreover, we must take into account the limitations of  
290 our methodological approach, i.e. the source localization of the EEG activity in the subcortical  
291 regions. We have to keep in mind that the spatial resolution in detecting and distinguishing  
292 neighboring brain regions is about 24 mm <sup>103</sup>. Therefore, our results in the caudate, putamen  
293 and pallidum are probably overlapping due to smearing of the sources. Keeping in mind these  
294 limitations and with respect to the lower robustness of our findings in the caudate, we can just  
295 encourage researchers to further investigate the neuropathophysiology of depression associated  
296 with the caudate nucleus functioning. More evidence from neuroimaging studies is needed to  
297 provide arguments for the next caudate-DBS tests in treating TRD. In an early case study, DBS  
298 of the ventral caudate nucleus markedly improved symptoms of depression in a patient with  
299 MDD and comorbid obsessive-compulsive disorder <sup>104</sup>. No change in depressive symptoms,  
300 however, was recently observed during the stimulation of the caudate in a study of three TRD

301 patients<sup>105</sup> and authors concluded the caudate to be less promising DBS target than the nucleus  
302 accumbens.

303 **Increased theta and alpha powers in depression.** We found a significantly higher power in  
304 the theta and alpha frequency bands in the depressed compared to the healthy control group in  
305 all the investigated subcortical structures consistently at both the population and single-subject  
306 levels. The power decrease in the beta and delta frequency bands was observed only in the right  
307 striatum at both levels.

308 Our findings might be in line with previous observations in the sensor space of the scalp EEG.  
309 Abnormally high power in alpha<sup>106 107 108</sup> and theta<sup>106 109 108</sup> frequency bands in parietal and  
310 occipital regions were found in depressed patients, lower than normal beta and delta power  
311 were also reported<sup>108</sup>. Recent evidence points, however, to opposite power changes showing  
312 that theta and alpha power might decrease, while beta power increases in depression<sup>110</sup>.  
313 Moreover, the same study reported negative association of the posterior alpha power with the  
314 depression severity. While changes in cortical theta and alpha activity were suggested to be  
315 inversely related to the level of cortical activation, enhancement of the cortical beta power was  
316 suggested to reflect higher level of anxiety symptoms in depressed patients<sup>106</sup>. To the best of  
317 our knowledge there is only one study that directly recorded electrophysiological activity in  
318 subcortical structures in depressive patients. In this study, a larger alpha activity in MDD  
319 patients compared with obsessive compulsive disorder was found in the limbic DBS targets  
320 (the anterior cingulate and the bed nucleus of the stria terminalis)<sup>111</sup>. Moreover, in the same  
321 study, the increased alpha power correlated with severity of depressive symptoms.  
322 Nevertheless, in spite of parallels with prior reports, the current link between the power changes  
323 in subcortical structures and depression awaits replication.

324 **Lower network impairments with more medication.** We found an inverse relationship  
325 between the intake of medication and the impairment of the investigated networks. Particularly,  
326 increased intake of antidepressants, antipsychotics, and mood stabilizers was associated with  
327 reduction of the global efficiency. This finding might be related to the pharmacological effect  
328 on the brain activity, i.e. a change towards the normalization of the hyper-connectivity in the  
329 cortico-striatal-pallidal-thalamic and limbic networks. The low sample size and great  
330 variability in medication made it, however, impossible to examine any potential influence of  
331 medication on the network impairments by comparing patients receiving a specific drug with  
332 those not receiving it. To summarize the various medications, an ordinal variable was used that  
333 is only a rough measurement of medication usage. Moreover, the duration of the illness rather

334 than the duration of the specific drug intake was considered in our study. Only doses of  
335 medication actually taken at the time of experiment were taken into consideration. The possible  
336 accumulated effect of specific drugs on connectivity results, thus, cannot be assessed.  
337 Therefore, the observed relationship between the global efficiency and medication should be  
338 viewed with caution. Interestingly, we have not found significant correlation between the  
339 global efficiency and intake of benzodiazepines. This negative finding suggests that even  
340 though benzodiazepines are known to have an effect on electrophysiological correlates of brain  
341 functions, the network properties might not be influenced. There were no significant  
342 correlations between the connectivity results and depressive symptom severity or other  
343 parameters describing the status of depression within the patient group. We suppose that  
344 heterogeneity of our dataset, in which patients with different disorders were included, might  
345 underlie this observation. We also found no relation between the connectivity results and  
346 education level or age. This finding suggests independence of the observed impairment on  
347 these demographic variables, however, the current sample size might be insufficient for such  
348 investigations.

#### 349 **Limitations of the study**

350 We here report sources of scalp-recorded electrophysiological brain activity in deep brain  
351 structures. We are aware of the limitations of EEG in sensing deep brain structures. However,  
352 previous work using simulations and source reconstruction provided indirect evidence for the  
353 detectability of subcortical sources in non-invasive EEG and magnetoencephalographic  
354 recordings<sup>112 113 114 115</sup>. Moreover, recent simultaneous scalp and intracranial recordings  
355 directly demonstrated that activity in deep brain structures spread to the scalp<sup>103 116</sup>. While  
356 Seeber and colleagues<sup>103</sup> used individual head models that improve source localization  
357 precision, a generic head model was used in the magnetoencephalographic study by Pizzo et  
358 al.<sup>116</sup>, similar to the approach used in our study. Nevertheless, the results that we report have  
359 to be interpreted with caution and need further validation by intracranial recordings in future  
360 studies.

361

#### 362 **Conclusions**

363 We found an overall increase in power in theta and alpha frequency bands in depressive patients  
364 compared to healthy controls in the subcortical regions constituting the cortico-striatal-pallidal-  
365 thalamic and limbic circuits. The network measures showed a higher than normal functional

366 connectivity arising from the right amygdala in depressive patients. The amygdala seems to  
367 play an important role in neurobiology of depression. Resting-state EEG directed functional  
368 connectivity is a useful tool for studying abnormal brain activity in depression.

369

## 370 **Methods**

371 **Subjects.** Data were collected from 26 depressive patients and 25 healthy controls. The two  
372 groups were matched by gender and there were no significant differences in age or education  
373 (see Table 1). On a subsample of this dataset we recently showed that the severity of depressive  
374 symptoms correlates with resting-state microstate dynamics<sup>117</sup>. The patients were recruited at  
375 the Department of Psychiatry, Faculty of Medicine, Masaryk University and University  
376 Hospital Brno, Czech Republic. The diagnostic process had two steps and was determined  
377 based on the clinical evaluation by two board-certified psychiatrists. First, the diagnosis was  
378 made according to the criteria for research of the International Classification of Disorders  
379 (ICD-10). Second, the diagnosis was confirmed by the Mini International Neuropsychiatric  
380 interview (M.I.N.I.) according to the Diagnostic and Statistical Manual (DSM-V). All patients  
381 were examined in the shortest time period after the admission and before the stabilization of  
382 treatment, typically during their first week of hospitalization. All patients met the criteria for  
383 at least a moderate degree of depression within the following affective disorders: bipolar  
384 affective disorder (F31), depressive episode (F32), recurrent depressive disorder (F33).  
385 Exclusion criteria for patients were any psychiatric or neurological comorbidity, IQ < 70,  
386 organic disorder with influence on the brain function, alcohol dependence or other substance  
387 dependence. All patients were in the on-medication state with marked interindividual  
388 variability in specific medicaments received. Control subjects were recruited by general  
389 practitioners from their database of clients. Control subjects underwent the M.I.N.I. by board-  
390 certified psychiatrists, to ensure that they had no previous or current psychiatric disorder  
391 according to the DSM-V criteria. The scores on the Montgomery-Åsberg Depression Rating  
392 Scale (MADRS), a specific questionnaire validated for patients with mood disorders<sup>118</sup> and  
393 the Clinical Global Impression (CGI)<sup>119</sup>, a general test validated for mental disorders, were  
394 used to evaluate the severity of depressive symptoms in patients. The status of depression was  
395 further described with life time count of depressive episodes and illness duration. Medication  
396 in 24 hours preceding the EEG examination was also recorded (see Table 2). This study was  
397 carried out in accordance with the recommendations of Ethics Committee of University  
398 Hospital Brno with written informed consent from all subjects.

399 **EEG - data acquisition and pre-processing steps.** Subjects were sitting in a comfortable  
400 upright position in an electrically shielded room with dimmed light. They were instructed to  
401 stay as calm as possible, to keep their eyes closed and to relax for 15 minutes. They were asked  
402 to stay awake. All participants were monitored by the cameras and in the event of signs of  
403 nodding off or EEG signs of drowsiness detected by visual inspection, the recording was  
404 stopped. The EEG was recorded with a high density 128-channel system (EGI System 400;  
405 Electrical Geodesic Inc., OR, USA),  $f_s = 1\text{kHz}$ , and Cz as acquisition reference.

406 Five minutes of EEG data were selected and visually assessed. Noisy channels with abundant  
407 artifacts were identified. EEG signal was band-pass filtered between 1 and 40 Hz with a 2nd-  
408 order Butterworth filter avoiding phase-distortion. Subsequently, in order to remove  
409 physiological artifacts, e.g. ballistocardiogram and oculo-motor artifacts, infomax-based  
410 Independent Component Analysis<sup>120</sup> was applied on all but one or two noisy channels. Only  
411 components related to ballistocardiogram, saccadic eye movements, and eye blinking were  
412 removed based on the waveform, topography and time course of the component. Then, the  
413 cleaned EEG recording was down-sampled at  $f_s = 250\text{ Hz}$  and the previously identified noisy  
414 channels were interpolated using a three-dimensional spherical spline<sup>121</sup>, and re-referenced to  
415 the average reference. For the following analyses, thirty 2-s EEG epochs free of artifacts were  
416 selected per subject. All the pre-processing steps were done using the freely available Cartool  
417 Software 3.70, programmed by Denis Brunet<sup>122</sup> and custom functions in MATLAB® R2018b.

418 **EEG source estimation.** We applied the LAURA algorithm implemented in Cartool<sup>122</sup> to  
419 compute the source reconstruction taking into account the patient's age to calibrate the skull  
420 conductivity<sup>123 124 125</sup>. The method restricts the solution space to the gray matter of the brain.  
421 Then, the cortex was parcellated into the 90 Automated Anatomical Labeling brain regions<sup>126</sup>.  
422 The dipoles in each ROI were represented with one unique time-series by a singular-value  
423 decomposition<sup>127</sup>.

424 **Time-variant multivariate autoregressive modeling.** The cortical waveforms computed after  
425 applying the singular-value decomposition, were fitted against a time-variant (tv) multivariate  
426 (MV) autoregressive (AR) model to overcome the problem of non-stationarity of the EEG data.  
427 If the EEG data are available as several trials of the same length, the cortical waveforms  
428 computed from the EEG data generates a collection of realizations of a multivariate stochastic  
429 process which can be combined in a multivariate, multi-trial time series<sup>127 128 67</sup>. The tv-MVAR  
430 matrices containing the model coefficients were computed in the framework of a MATLAB  
431 toolbox (code available upon reasonable request to the authors) that implements the adaptive



432 Kalman filtering and information Partial Directed Coherence (iPDC) in the source space <sup>67 129</sup>  
433 <sup>130</sup>. The model order of the tv-MAR and the Kalman filter adaptation constant were chosen  
434 applying the method proposed by Rubega and colleagues <sup>128</sup>, i.e., evaluating the partial  
435 derivatives of a residual minimization function obtained varying simultaneously both  $p$  ( $p \in [1,$   
436  $15]$ ) and  $c$  ( $c \in [0, 0.03]$ ). By means of the model coefficients, we computed the parametric  
437 spectral power density and the iPDC absolute values for each subject. For each patient, we  
438 obtained a 4-dimensional matrix [ROIs x ROIs x frequency x time] that represented the directed  
439 information flow from one ROI to another for each frequency at each time sample. In this way  
440 we performed the analysis on the *single-subject* level to compare the two groups quantitatively.  
441 Since the features in the power spectra were consistent among subjects in the same population  
442 (patients vs controls), we also performed the analysis on the *population* level. A *population*  
443 *subject* was built by estimating the tv-MVAR model, where each trial in the input was a  
444 different subject. One power spectral density matrix and one connectivity matrix [ROIs x ROIs  
445 x frequency x time] were obtained for each group (controls and patients). In other words,  
446 subjects were combined as trials, assuming respectively humans as multiple realizations of  
447 their own brain processes, with the purpose to show that the two approaches, i.e., *single subject*  
448 and *population*, give equivalent results in differentiating patients vs controls. In the last decade,  
449 population-based approaches were successfully exploited in computer simulations engineered  
450 to evaluate the safety and limitations of closed-loop control treatment algorithms <sup>131 132</sup>.  
451 Population-based approaches for MVAR/PDC modelling are currently lacking and this might  
452 be considered a first attempt justified by the consistent features estimated in the frequency  
453 domain among subjects belonging to the same population (patients vs controls). Further details  
454 on the connectivity estimation are reported in the Supplementary Information.

455 **Network metrics.** In order to study the peculiarities of the brain network in patients vs controls,  
456 the brain was represented as a digraph defined by a collection of nodes and directed links  
457 (directional edges). Nodes in the brain network represent brain regions, i.e., the 90 ROIs, while  
458 the directed links represent the values computed by iPDC. Thus, the weight of such link can  
459 vary in the interval [0-1] and it represents the amount of mutual information flowing between  
460 ROIs. We defined twelve ROIs, including the bilateral amygdala, anterior cingulum, thalamus,  
461 putamen, caudate, and pallidum, to examine the directed functional connectivity between these  
462 seeds and the whole brain. Significant differences in power between patients and controls were  
463 observed in the *single-subject* level in alpha and theta frequency bands in all these six  
464 anatomical structures. Therefore, we restricted the network analysis to this [4-12] Hz frequency

465 range. To evaluate how much the system is fault tolerant and how much the communication is  
 466 efficient, the global efficiency for the whole brain and the local efficiency, clustering  
 467 coefficient, strength and outflow for each of these twelve investigated ROIs were computed.  
 468 To compute all the graph measures, the scripts and functions implemented on the freely  
 469 available MATLAB toolbox<sup>133</sup> were customized.

470 **Global efficiency.** Global efficiency is defined as the average minimum path length between  
 471 two nodes in the network. This measure is inversely related to topological distance between  
 472 nodes and is typically interpreted as a measure of the capacity for parallel information transfer  
 473 and integrated processing<sup>134</sup>.

474 **Local efficiency.** Local efficiency is defined as the average efficiency of the local subgraphs  
 475<sup>135</sup>, i.e. the global efficiency computed on the neighborhood of the node. It reflects the ability  
 476 of a network to transmit information at the local level. This quantity plays a role similar to the  
 477 clustering coefficient since it reveals how much the system is fault tolerant, i.e., it shows how  
 478 efficient the communication is between the first neighbors of  $i$  when  $i$  is removed.

$$479 \quad \overrightarrow{E}_{loc} = \frac{1}{2n} \sum_{i \in N} \frac{\sum_{j, h \in N, j \neq i} (a_{ij} + a_{ji})(a_{ih} + a_{hi})([\overrightarrow{d}_{jh}(N_i)]^{-1} + [\overrightarrow{d}_{hj}(N_i)]^{-1})}{(k_i^{out} + k_i^{in})(k_i^{out} + k_i^{in} - 1) - 2 \sum_{j \in N} a_{ij} a_{ji}} \quad (1)$$

480 where  $k_i^{out}$  is the out-degree of node  $i$ ,  $k_i^{in}$  is the in-degree of node  $i$ , and  $a_{ij}$  is the connection  
 481 status between node  $i$  and node  $j$ , i.e.,  $a_{ij} = 1$  if the link between  $i$  and  $j$  exists,  $a_{ij} = 0$   
 482 otherwise.  $N$  is the set of nodes in the network.  $n$  is the number of nodes and  $\overrightarrow{d}_{jh}(N_i)$  is the  
 483 length of the shortest directed path between  $j$  (any node in the network) and  $h$  (any node that  
 484 neighbors with  $i$ ).

485

486 **Clustering coefficient.** Clustering coefficient reflects the prevalence of clustered connectivity  
 487 around an individual brain region<sup>136</sup>:

$$488 \quad cc_i = \frac{2t_i}{k_i(k_i - 1)} \quad (2)$$

489 where  $t_i$  are the number of triangles around the node  $i$ , and  $k_i$  is the degree of node  $i$ , i.e., the  
 490 number of links connected to node  $i$ . In our case of a weighted directed network, a weighted  
 491 directed version of clustering coefficient was used<sup>137</sup>:

$$\vec{CC}_i = \frac{\vec{t}_i}{(k_i^{out} + k_i^{in})(k_i^{out} + k_i^{in} - 1) - 2 \sum_{j \in N} a_{ij} a_{ji}} \quad (3)$$

492 where  $\vec{t}_i$  are the number of directed triangles around the node  $i$ ,  $k_i^{out}$  is the out-degree of node  
493  $i$ ,  $k_i^{in}$  is the in-degree of node  $i$ , and  $a_{ij}$  is the connection status between the nodes  $i$  and  $j$ , i.e.,  
494  $a_{ij} = 1$  if the link between  $i$  and  $j$  exists,  $a_{ij} = 0$  otherwise.  $N$  is the set of nodes in the  
495 network.

497 **Strength and outflow.** Finally, the connectivity patterns between the different cortical regions  
498 were summarized by representing the strength that quantifies for each node the sum of weights  
499 of all links connected to the node and the total outflow from a region toward the others,  
500 generated by the sum of all the statistically significant links obtained by application of the  
501 iPDC. The greatest amount of information outflow depicts the ROI as one of the main sources  
502 (drivers) of functional connections to the other ROIs

503 <sup>138</sup>.

504 **Laterality.** For all the network metrics explained in the previous paragraph, we also computed  
505 a laterality index, which is defined as  $\frac{Left_{metric} - Right_{metric}}{Left_{metric} + Right_{metric}}$  to test if the measures significantly  
506 differentiate between the two hemispheres. Laterality index and all network metrics were  
507 calculated for both groups.

508 **Statistical analysis.** To assess whether or not the changes in the network metrics were  
509 statistically significant between patients and controls, paired Student's t-tests were computed  
510 under the hypothesis of normal distribution of samples (Lilliefors test), otherwise Wilcoxon  
511 rank-sign tests were considered. To test whether the age and education level predict the values  
512 of the spectral power distribution and the network metrics in patients, a multiple linear  
513 regression was performed. We also tested the influence of the clinical data on the connectivity  
514 results. A multiple linear regression was performed exploiting correlation of the connectivity  
515 results with four variables describing the status of depression and two variables describing the  
516 medication status in terms of the intake of benzodiazepines (BZP), antidepressants,  
517 antipsychotics, and mood stabilizers (AD/AP/MS). These six clinical variables are provided  
518 for each patient in Table 2. We checked through the following multiple linear regression  
519 models (4) (5), if the response variable  $Y$  depends on a number of predictor variables  $X_i$ :

$$Y = \beta_0 + \beta_1 X_1 + \dots + \beta_k X_k + \varepsilon \quad (4)$$

$$Y = \beta_0 + \beta_1 X + \beta_2 X^2 + \varepsilon \quad (5)$$

522 where the  $\varepsilon$  are the residual terms of the model and  $\beta_0, \beta_1, \beta_2, \dots, \beta_k$  are the  $k$  regression  
523 coefficients. Both the clinical data and the power and network metrics were used once as  
524 predictors and once as response variables.

525 **Ethics statement.** All participants gave their written informed consent prior to the experiment  
526 and the study received the approval of the Ethics Committee of University Hospital Brno in  
527 Brno, Czech Republic. All experiments of this study were performed in accordance with  
528 relevant guidelines and regulations.

529

## 530 **References**

- 531 1. Andrade, L. *et al.* The epidemiology of major depressive episodes: results from the  
532 International Consortium of Psychiatric Epidemiology (ICPE) surveys. *Int. J. Methods*  
533 *Psychiatr. Res.* **12**, 3–21 (2003).
- 534 2. Bora, E., Harrison, B. J., Davey, C. G., Yü Cel, M. & Pantelis, C. Meta-analysis of volumetric  
535 abnormalities in cortico-striatal-pallidal-thalamic circuits in major depressive disorder.  
536 doi:10.1017/S0033291711001668
- 537 3. Yang, J. *et al.* Amygdala Atrophy and Its Functional Disconnection with the Cortico-Striatal-  
538 Pallidal-Thalamic Circuit in Major Depressive Disorder in Females. *PLoS One* **12**, e0168239  
539 (2017).
- 540 4. Zhang, B. *et al.* Mapping anhedonia-specific dysfunction in a transdiagnostic approach: an ALE  
541 meta-analysis. *Brain Imaging Behav.* **10**, 920–939 (2016).
- 542 5. Disner, S. G., Beevers, C. G., Haigh, E. A. P. & Beck, A. T. Neural mechanisms of the cognitive  
543 model of depression. *Nat. Rev. Neurosci.* **12**, 467–477 (2011).
- 544 6. Surguladze, S. *et al.* A differential pattern of neural response toward sad versus happy facial  
545 expressions in major depressive disorder. *Biol. Psychiatry* **57**, 201–209 (2005).
- 546 7. Sheline, Y. I. *et al.* Increased amygdala response to masked emotional faces in depressed  
547 subjects resolves with antidepressant treatment: an fMRI study. *Biol. Psychiatry* **50**, 651–658  
548 (2001).
- 549 8. Siegle, G. J., Thompson, W., Carter, C. S., Steinhauer, S. R. & Thase, M. E. Increased Amygdala  
550 and Decreased Dorsolateral Prefrontal BOLD Responses in Unipolar Depression: Related and

- 551 Independent Features. *Biol. Psychiatry* **61**, 198–209 (2007).
- 552 9. Nugent, A. C., Robinson, S. E., Coppola, R., Furey, M. L. & Zarate, C. A. Group differences in  
553 MEG-ICA derived resting state networks: Application to major depressive disorder.  
554 *Neuroimage* **118**, 1–12 (2015).
- 555 10. Knyazev, G. G. *et al.* Task-positive and task-negative networks in major depressive disorder: A  
556 combined fMRI and EEG study. *J. Affect. Disord.* **235**, 211–219 (2018).
- 557 11. Lu, Y. *et al.* The volumetric and shape changes of the putamen and thalamus in first episode,  
558 untreated major depressive disorder. *NeuroImage. Clin.* **11**, 658–666 (2016).
- 559 12. Kim, M. J., Hamilton, J. P. & Gotlib, I. H. Reduced caudate gray matter volume in women with  
560 major depressive disorder. *Psychiatry Res. Neuroimaging* **164**, 114–122 (2008).
- 561 13. Sheline, Y. I., Price, J. L., Yan, Z. & Mintun, M. A. Resting-state functional MRI in depression  
562 unmasks increased connectivity between networks via the dorsal nexus. *Proc. Natl. Acad. Sci.*  
563 **107**, 11020–11025 (2010).
- 564 14. Kuhn, S. & Gallinat, J. Resting-State Brain Activity in Schizophrenia and Major Depression: A  
565 Quantitative Meta-Analysis. *Schizophr. Bull.* **39**, 358–365 (2013).
- 566 15. Lorenzetti, V., Allen, N. B., Fornito, A. & Yücel, M. Structural brain abnormalities in major  
567 depressive disorder: A selective review of recent MRI studies. *J. Affect. Disord.* **117**, 1–17  
568 (2009).
- 569 16. Veer, I. M. Whole brain resting-state analysis reveals decreased functional connectivity in  
570 major depression. *Front. Syst. Neurosci.* **4**, (2010).
- 571 17. Hamilton, J. P. *et al.* Functional Neuroimaging of Major Depressive Disorder: A Meta-Analysis  
572 and New Integration of Baseline Activation and Neural Response Data. *Am. J. Psychiatry* **169**,  
573 693–703 (2012).
- 574 18. Bielau, H. *et al.* Volume deficits of subcortical nuclei in mood disorders. *Eur. Arch. Psychiatry*  
575 *Clin. Neurosci.* **255**, 401–412 (2005).
- 576 19. Holtzheimer, P. E. & Mayberg, H. S. Stuck in a rut: rethinking depression and its treatment.  
577 *Trends Neurosci.* **34**, 1–9 (2011).

- 578 20. Drobisz, D. & Damborská, A. Deep brain stimulation targets for treating depression. *Behav.*  
579 *Brain Res.* **359**, 266–273 (2019).
- 580 21. Holtzheimer, P. E. *et al.* Subcallosal Cingulate Deep Brain Stimulation for Treatment-Resistant  
581 Unipolar and Bipolar Depression. *Arch. Gen. Psychiatry* **69**, 150 (2012).
- 582 22. KNIGHT, G. STEREOTACTIC TRACTOTOMY IN THE SURGICAL TREATMENT OF MENTAL ILLNESS.  
583 *J. Neurol. Neurosurg. Psychiatry* **28**, 304–310 (1965).
- 584 23. Dougherty, D. D. *et al.* Cerebral metabolic correlates as potential predictors of response to  
585 anterior cingulotomy for treatment of major depression. *J. Neurosurg.* **99**, 1010–1017 (2003).
- 586 24. Hamani, C. *et al.* Deep brain stimulation in rats: Different targets induce similar  
587 antidepressant-like effects but influence different circuits. *Neurobiol. Dis.* **71**, 205–214 (2014).
- 588 25. Hamani, C. & Nóbrega, J. N. Deep brain stimulation in clinical trials and animal models of  
589 depression. *Eur. J. Neurosci.* **32**, 1109–1117 (2010).
- 590 26. Hamani, C. *et al.* Antidepressant-Like Effects of Medial Prefrontal Cortex Deep Brain  
591 Stimulation in Rats. *Biol. Psychiatry* **67**, 117–124 (2010).
- 592 27. Moshe, H. *et al.* Prelimbic Stimulation Ameliorates Depressive-Like Behaviors and Increases  
593 Regional BDNF Expression in a Novel Drug-Resistant Animal Model of Depression. *Brain*  
594 *Stimul.* **9**, 243–250 (2016).
- 595 28. Thiele, S., Furlanetti, L., Pfeiffer, L. M., Coenen, V. A. & Döbrössy, M. D. The effects of  
596 bilateral, continuous, and chronic Deep Brain Stimulation of the medial forebrain bundle in a  
597 rodent model of depression. *Exp. Neurol.* **303**, 153–161 (2018).
- 598 29. Rummel, J. *et al.* Testing different paradigms to optimize antidepressant deep brain  
599 stimulation in different rat models of depression. *J. Psychiatr. Res.* **81**, 36–45 (2016).
- 600 30. Clemm Von Hohenberg, C. *et al.* Lateral habenula perturbation reduces default-mode  
601 network connectivity in a rat model of depression. *Transl. Psychiatry* **8**, (2018).
- 602 31. Baeken, C., Duprat, R., Wu, G. R., De Raedt, R. & van Heeringen, K. Subgenual Anterior  
603 Cingulate–Medial Orbitofrontal Functional Connectivity in Medication-Resistant Major  
604 Depression: A Neurobiological Marker for Accelerated Intermittent Theta Burst Stimulation  
605 Treatment? *Biol. Psychiatry Cogn. Neurosci. Neuroimaging* **2**, 556–565 (2017).

- 606 32. Johansen-Berg, H. *et al.* Anatomical connectivity of the subgenual cingulate region targeted  
607 with deep brain stimulation for treatment-resistant depression. *Cereb. Cortex* **18**, 1374–1383  
608 (2008).
- 609 33. Greicius, M. D. *et al.* Resting-State Functional Connectivity in Major Depression: Abnormally  
610 Increased Contributions from Subgenual Cingulate Cortex and Thalamus. *Biol. Psychiatry* **62**,  
611 429–437 (2007).
- 612 34. Riva-Posse, P. *et al.* Defining critical white matter pathways mediating successful subcallosal  
613 cingulate deep brain stimulation for treatment-resistant depression. *Biol. Psychiatry* **76**, 963–  
614 969 (2014).
- 615 35. Quevedo, K. *et al.* Ventral Striatum Functional Connectivity during Rewards and Losses and  
616 Symptomatology in Depressed Patients. *Biol. Psychol.* **123**, 62–73 (2017).
- 617 36. Gutman, D. A., Holtzheimer, P. E., Behrens, T. E. J., Johansen-Berg, H. & Mayberg, H. S. A  
618 Tractography Analysis of Two Deep Brain Stimulation White Matter Targets for Depression.  
619 *Biol. Psychiatry* **65**, 276–282 (2009).
- 620 37. Bracht, T. *et al.* White matter microstructure alterations of the medial forebrain bundle in  
621 melancholic depression. *J. Affect. Disord.* **155**, 186–193 (2014).
- 622 38. Kaiser, R. H., Andrews-Hanna, J. R., Wager, T. D. & Pizzagalli, D. A. Large-scale network  
623 dysfunction in major depressive disorder: A meta-analysis of resting-state functional  
624 connectivity. *JAMA Psychiatry* **72**, 603–611 (2015).
- 625 39. Smith, S. M. *et al.* Functional connectomics from resting-state fMRI. *Trends in Cognitive*  
626 *Sciences* **17**, 666–682 (2013).
- 627 40. Fox, M. D. & Raichle, M. E. Spontaneous fluctuations in brain activity observed with  
628 functional magnetic resonance imaging. *Nature Reviews Neuroscience* **8**, 700–711 (2007).
- 629 41. Hamilton, J. P. *et al.* Default-Mode and Task-Positive Network Activity in Major Depressive  
630 Disorder: Implications for Adaptive and Maladaptive Rumination. *Biol. Psychiatry* **70**, 327–333  
631 (2011).
- 632 42. Lui, S. *et al.* Resting-state functional connectivity in treatment-resistant depression. *Am. J.*  
633 *Psychiatry* **168**, 642–648 (2011).

- 634 43. Whitton, A. E. *et al.* Electroencephalography Source Functional Connectivity Reveals  
635 Abnormal High-Frequency Communication Among Large-Scale Functional Networks in  
636 Depression. *Biol. Psychiatry Cogn. Neurosci. Neuroimaging* **3**, 50–58 (2018).
- 637 44. Sikora, M. *et al.* Salience Network Functional Connectivity Predicts Placebo Effects in Major  
638 Depression. *Biol. Psychiatry Cogn. Neurosci. Neuroimaging* **1**, 68–76 (2016).
- 639 45. Gong, J. Y. *et al.* Disrupted functional connectivity within the default mode network and  
640 salience network in unmedicated bipolar II disorder. *Prog. Neuro-Psychopharmacology Biol.*  
641 *Psychiatry* **88**, 11–18 (2019).
- 642 46. Sacchet, M. D. *et al.* Large-scale hypoconnectivity between resting-state functional networks  
643 in unmedicated adolescent major depressive disorder. *Neuropsychopharmacology* **41**, 2951–  
644 2960 (2016).
- 645 47. Williams, K. A., Mehta, N. S., Redei, E. E., Wang, L. & Procissi, D. Aberrant resting-state  
646 functional connectivity in a genetic rat model of depression. *Psychiatry Res. - Neuroimaging*  
647 **222**, 111–113 (2014).
- 648 48. Kopell, B. H., Greenberg, B. & Rezai, A. R. Deep Brain Stimulation for Psychiatric Disorders. *J.*  
649 *Clin. Neurophysiol.* **21**, 51–67 (2004).
- 650 49. Sartorius, A. *et al.* Remission of Major Depression Under Deep Brain Stimulation of the Lateral  
651 Habenula in a Therapy-Refractory Patient. *Biological Psychiatry* **67**, (2010).
- 652 50. Kukleta, M., Bob, P., Brázdil, M., Roman, R. & Rektor, I. The level of frontal-temporal beta-2  
653 band EEG synchronization distinguishes anterior cingulate cortex from other frontal regions.  
654 *Conscious. Cogn.* **19**, 879–886 (2010).
- 655 51. Brázdil, M. *et al.* Directional functional coupling of cerebral rhythms between anterior  
656 cingulate and dorsolateral prefrontal areas during rare stimuli: A directed transfer function  
657 analysis of human depth EEG signal. *Hum. Brain Mapp.* **30**, 138–146 (2009).
- 658 52. Kibleur, A. *et al.* Stimulation of subgenual cingulate area decreases limbic top-down effect on  
659 ventral visual stream: A DBS-EEG pilot study. *Neuroimage* **146**, 544–553 (2017).
- 660 53. Pereda, E., Quiroga, R. Q. & Bhattacharya, J. Nonlinear multivariate analysis of  
661 neurophysiological signals. *Prog. Neurobiol.* **77**, 1–37 (2005).



- 662 54. Seth, A. K., Barrett, A. B. & Barnett, L. Granger Causality Analysis in Neuroscience and  
663 Neuroimaging. *J. Neurosci.* **35**, 3293–3297 (2015).
- 664 55. Granger, C. W. J. Investigating Causal Relations by Econometric Models and Cross-spectral  
665 Methods. *Econometrica* **37**, 424–438 (1969).
- 666 56. Leistriz, L. *et al.* Connectivity Analysis of Somatosensory Evoked Potentials in Patients with  
667 Major Depression. *Methods Inf. Med.* **49**, 484–491 (2010).
- 668 57. Yu Sun, Sijung Hu, Chambers, J., Yisheng Zhu & Shanbao Tong. Graphic patterns of cortical  
669 functional connectivity of depressed patients on the basis of EEG measurements. in *2011*  
670 *Annual International Conference of the IEEE Engineering in Medicine and Biology Society*  
671 1419–1422 (IEEE, 2011). doi:10.1109/IEMBS.2011.6090334
- 672 58. Tang, Y. *et al.* The altered cortical connectivity during spatial search for facial expressions in  
673 major depressive disorder. *Prog. Neuro-Psychopharmacology Biol. Psychiatry* **35**, 1891–1900  
674 (2011).
- 675 59. Mao, W., Li, Y., Tang, Y., Li, H. & Wang, J. The coherence changes in the depressed patients in  
676 response to different facial expressions. in *Lecture Notes in Computer Science (including*  
677 *subseries Lecture Notes in Artificial Intelligence and Lecture Notes in Bioinformatics)* **6064**  
678 **LNCS**, 392–399 (2010).
- 679 60. Wang, C. *et al.* The brain network research of poststroke depression based on partial directed  
680 coherence (PDC). *Chinese J. Biomed. Eng.* **34**, 385–391 (2015).
- 681 61. Sun, Y., Li, Y., Zhu, Y., Chen, X. & Tong, S. Electroencephalographic differences between  
682 depressed and control subjects: An aspect of interdependence analysis. *Brain Res. Bull.* **76**,  
683 559–564 (2008).
- 684 62. Schoffelen, J.-M. & Gross, J. Source connectivity analysis with MEG and EEG. *Hum. Brain*  
685 *Mapp.* **30**, 1857–1865 (2009).
- 686 63. He, B. *et al.* Electrophysiological Brain Connectivity: Theory and Implementation. *IEEE Trans.*  
687 *Biomed. Eng.* **66**, 2115–2137 (2019).
- 688 64. Coito, A., Michel, C. M., van Mierlo, P., Vulliemoz, S. & Plomp, G. Directed Functional Brain  
689 Connectivity Based on EEG Source Imaging: Methodology and Application to Temporal Lobe  
690 Epilepsy. *IEEE Trans. Biomed. Eng.* **63**, 2619–2628 (2016).

- 691 65. Sperdin, H. F. *et al.* Early alterations of social brain networks in young children with autism.  
692 *Elife* **7**, (2018).
- 693 66. Coito, A., Michel, C. M., Vulliemoz, S. & Plomp, G. Directed functional connections underlying  
694 spontaneous brain activity. *Hum. Brain Mapp.* **40**, 879–888 (2019).
- 695 67. Milde, T. *et al.* A new Kalman filter approach for the estimation of high-dimensional time-  
696 variant multivariate AR models and its application in analysis of laser-evoked brain potentials.  
697 *Neuroimage* **50**, 960–969 (2010).
- 698 68. Pessoa, L. & Adolphs, R. Emotion processing and the amygdala: from a ‘low road’ to ‘many  
699 roads’ of evaluating biological significance. *Nat. Rev. Neurosci.* **11**, 773–782 (2010).
- 700 69. Zheng, J. *et al.* Amygdala-hippocampal dynamics during salient information processing. *Nat.*  
701 *Commun.* **8**, 14413 (2017).
- 702 70. Freese, Jennifer L.; Amaral, D. G. *Neuroanatomy of the primate amygdala. - PsycNET.*  
703 (Guilford Press, 2009).
- 704 71. Kober, H. *et al.* Functional grouping and cortical–subcortical interactions in emotion: A meta-  
705 analysis of neuroimaging studies. *Neuroimage* **42**, 998–1031 (2008).
- 706 72. Thomas Yeo, B. T. *et al.* The organization of the human cerebral cortex estimated by intrinsic  
707 functional connectivity. *J. Neurophysiol.* **106**, 1125–1165 (2011).
- 708 73. Price, J. L. & Drevets, W. C. Neurocircuitry of Mood Disorders. *Neuropsychopharmacology* **35**,  
709 192–216 (2010).
- 710 74. Hamilton, J. P., Chen, M. C. & Gotlib, I. H. Neural systems approaches to understanding major  
711 depressive disorder: An intrinsic functional organization perspective. *Neurobiol. Dis.* **52**, 4–11  
712 (2013).
- 713 75. Ramasubbu, R. *et al.* Reduced Intrinsic Connectivity of Amygdala in Adults with Major  
714 Depressive Disorder. *Front. Psychiatry* **5**, (2014).
- 715 76. Tang, S. *et al.* Abnormal amygdala resting-state functional connectivity in adults and  
716 adolescents with major depressive disorder: A comparative meta-analysis. *EBioMedicine* **36**,  
717 436–445 (2018).

- 718 77. Tang, S. *et al.* Anomalous functional connectivity of amygdala subregional networks in major  
719 depressive disorder. *Depress. Anxiety* **36**, 712–722 (2019).
- 720 78. Zhang, X. F., He, X., Wu, L., Liu, C. J. & Wu, W. Altered Functional Connectivity of Amygdala  
721 with the Fronto-Limbic-Striatal Circuit in Temporal Lobe Lesion as a Proposed Mechanism for  
722 Poststroke Depression. *Am. J. Phys. Med. Rehabil.* **98**, 303–310 (2019).
- 723 79. Ferdek, M. A., van Rijn, C. M. & Wyczesany, M. Depressive rumination and the emotional  
724 control circuit: An EEG localization and effective connectivity study. *Cogn. Affect. Behav.*  
725 *Neurosci.* **16**, 1099–1113 (2016).
- 726 80. van Eijndhoven, P. *et al.* Amygdala Volume Marks the Acute State in the Early Course of  
727 Depression. *Biol. Psychiatry* **65**, 812–818 (2009).
- 728 81. Sandu, A.-L. *et al.* Amygdala and regional volumes in treatment-resistant *versus*  
729 nontreatment-resistant depression patients. *Depress. Anxiety* **34**, 1065–1071 (2017).
- 730 82. Bauer, I. E. *et al.* Amygdala enlargement in unaffected offspring of bipolar parents. *J.*  
731 *Psychiatr. Res.* **59**, 200–205 (2014).
- 732 83. Inman, C. S. *et al.* Direct electrical stimulation of the amygdala enhances declarative memory  
733 in humans. *Proc. Natl. Acad. Sci.* **115**, 98–103 (2018).
- 734 84. Bijanki, K. R. *et al.* Case Report: Stimulation of the Right Amygdala Induces Transient Changes  
735 in Affective Bias. *Brain Stimul.* **7**, 690–693 (2014).
- 736 85. Tyrand, R., Seeck, M., Pollo, C. & Boëx, C. Effects of amygdala–hippocampal stimulation on  
737 synchronization. *Epilepsy Res.* **108**, 327–330 (2014).
- 738 86. Tyrand, R. *et al.* Effects of amygdala–hippocampal stimulation on interictal epileptic  
739 discharges. *Epilepsy Res.* **99**, 87–93 (2012).
- 740 87. Langevin, J.-P. *et al.* Deep Brain Stimulation of the Basolateral Amygdala: Targeting Technique  
741 and Electrodiagnostic Findings. *Brain Sci.* **6**, 28 (2016).
- 742 88. Koek, R. J. *et al.* Deep brain stimulation of the basolateral amygdala for treatment-refractory  
743 combat post-traumatic stress disorder (PTSD): study protocol for a pilot randomized  
744 controlled trial with blinded, staggered onset of stimulation. *Trials* **15**, 356 (2014).

- 745 89. Sturm, V. *et al.* DBS in the basolateral amygdala improves symptoms of autism and related  
746 self-injurious behavior: a case report and hypothesis on the pathogenesis of the disorder.  
747 *Front. Hum. Neurosci.* **6**, 341 (2013).
- 748 90. Admon, R. *et al.* Striatal hypersensitivity during stress in remitted individuals with recurrent  
749 depression. *Biol. Psychiatry* **78**, 67–76 (2015).
- 750 91. Marchand, W. R. & Yurgelun-Todd, D. Striatal structure and function in mood disorders: a  
751 comprehensive review. *Bipolar Disord.* **12**, 764–785 (2010).
- 752 92. Bluhm, R. *et al.* Resting state default-mode network connectivity in early depression using a  
753 seed region-of-interest analysis: Decreased connectivity with caudate nucleus. *Psychiatry*  
754 *Clin. Neurosci.* **63**, 754–761 (2009).
- 755 93. Butters, M. A. *et al.* Three-Dimensional Surface Mapping of the Caudate Nucleus in Late-Life  
756 Depression. *Am. J. Geriatr. Psychiatry* **17**, 4–12 (2009).
- 757 94. Ma, C. *et al.* Resting-State Functional Connectivity Bias of Middle Temporal Gyrus and  
758 Caudate with Altered Gray Matter Volume in Major Depression. *PLoS One* **7**, e45263 (2012).
- 759 95. Krishnan, K. R. R. Magnetic Resonance Imaging of the Caudate Nuclei in Depression. *Arch.*  
760 *Gen. Psychiatry* **49**, 553 (1992).
- 761 96. Tymofiyeva, O. *et al.* DTI-based connectome analysis of adolescents with major depressive  
762 disorder reveals hypoconnectivity of the right caudate. *J. Affect. Disord.* **207**, 18–25 (2017).
- 763 97. Khundakar, A., Morris, C., Oakley, A. & Thomas, A. J. Morphometric Analysis of Neuronal and  
764 Glial Cell Pathology in the Caudate Nucleus in Late-Life Depression. *Am. J. Geriatr. Psychiatry*  
765 **19**, 132–141 (2011).
- 766 98. Hannestad, J. *et al.* White matter lesion volumes and caudate volumes in late-life depression.  
767 *Int. J. Geriatr. Psychiatry* **21**, 1193–1198 (2006).
- 768 99. Pillay, S. A quantitative magnetic resonance imaging study of caudate and lenticular nucleus  
769 gray matter volume in primary unipolar major depression: relationship to treatment response  
770 and clinical severity. *Psychiatry Res. Neuroimaging* **84**, 61–74 (1998).
- 771 100. Price, J. L. & Drevets, W. C. Neural circuits underlying the pathophysiology of mood disorders.  
772 *Trends Cogn. Sci.* **16**, 61–71 (2012).

- 773 101. Limbic-cortical dysregulation: a proposed model of depression. *J. Neuropsychiatry Clin.*  
774 *Neurosci.* **9**, 471–481 (1997).
- 775 102. Pizzagalli, D. A. Frontocingulate Dysfunction in Depression: Toward Biomarkers of Treatment  
776 Response. *Neuropsychopharmacology* **36**, 183–206 (2011).
- 777 103. Seeber, M. *et al.* Subcortical electrophysiological activity is detectable with high-density EEG  
778 source imaging. *Nat. Commun.* **10**, 753 (2019).
- 779 104. Aouizerate, B. *et al.* Deep brain stimulation of the ventral caudate nucleus in the treatment of  
780 obsessive—compulsive disorder and major depression. *J. Neurosurg.* **101**, 682–686 (2004).
- 781 105. Millet, B. *et al.* Limbic versus cognitive target for deep brain stimulation in treatment-  
782 resistant depression: Accumbens more promising than caudate. *Eur. Neuropsychopharmacol.*  
783 **24**, 1229–1239 (2014).
- 784 106. Grin-Yatsenko, V. A., Baas, I., Ponomarev, V. A. & Kropotov, J. D. EEG Power Spectra at Early  
785 Stages of Depressive Disorders. *J. Clin. Neurophysiol.* **26**, 401–406 (2009).
- 786 107. Pollock, V. E. & Schneider, L. S. Topographic Quantitative EEG in Elderly Subjects with Major  
787 Depression. *Psychophysiology* **27**, 438–444 (1990).
- 788 108. Roemer, R. A., Shagass, C., Dubin, W., Jaffe, R. & Siegal, L. Quantitative EEG in elderly  
789 depressives. *Brain Topogr.* **4**, 285–290 (1992).
- 790 109. Kwon, J. S., Youn, T. & Jung, H. Y. Right hemisphere abnormalities in major depression:  
791 Quantitative electroencephalographic findings before and after treatment. *J. Affect. Disord.*  
792 **40**, 169–173 (1996).
- 793 110. Jiang, H. *et al.* Predictability of depression severity based on posterior alpha oscillations. *Clin.*  
794 *Neurophysiol.* **127**, 2108–2114 (2016).
- 795 111. Neumann, W.-J. *et al.* Different patterns of local field potentials from limbic DBS targets in  
796 patients with major depressive and obsessive compulsive disorder. *Mol. Psychiatry* **19**, 1186–  
797 1192 (2014).
- 798 112. Mégevand, P. *et al.* Electric source imaging of interictal activity accurately localises the  
799 seizure onset zone. *J. Neurol. Neurosurg. Psychiatry* **85**, 38–43 (2014).

- 800 113. Michel, C. M. *et al.* 128-Channel EEG source imaging in epilepsy: Clinical yield and localization  
801 precision. *J. Clin. Neurophysiol.* **21**, 71–83 (2004).
- 802 114. Attal, Y. & Schwartz, D. Assessment of Subcortical Source Localization Using Deep Brain  
803 Activity Imaging Model with Minimum Norm Operators: A MEG Study. *PLoS One* **8**, 59856  
804 (2013).
- 805 115. Krishnaswamy, P. *et al.* Sparsity enables estimation of both subcortical and cortical activity  
806 from MEG and EEG. *Proc. Natl. Acad. Sci. U. S. A.* **114**, E10465–E10474 (2017).
- 807 116. Pizzo, F. *et al.* Deep brain activities can be detected with magnetoencephalography. *Nat.*  
808 *Commun.* **10**, 971 (2019).
- 809 117. Damborská, A. *et al.* EEG Resting-State Large-Scale Brain Network Dynamics Are Related to  
810 Depressive Symptoms. *Front. Psychiatry* **10**, (2019).
- 811 118. Williams, J. B. W. & Kobak, K. A. Development and reliability of a structured interview guide  
812 for the Montgomery-Åsberg Depression Rating Scale (SIGMA). *Br. J. Psychiatry* **192**, 52–58  
813 (2008).
- 814 119. Guy, W. *ECDEU assessment manual for psychopharmacology*. (U.S. Dept. of Health Education  
815 and Welfare Public Health Service Alcohol Drug Abuse and Mental Health Administration  
816 National Institute of Mental Health Psychopharmacology Research Branch, 1976).
- 817 120. Jung, T.-P. *et al.* Removal of eye activity artifacts from visual event-related potentials in  
818 normal and clinical subjects. *Clin. Neurophysiol.* **111**, 1745–1758 (2000).
- 819 121. Perrin, F., Pernier, J., Bertrand, O. & Echallier, J. F. Spherical splines for scalp potential and  
820 current density mapping. *Electroencephalogr. Clin. Neurophysiol.* **72**, 184–187 (1989).
- 821 122. “the Cartool Community group,” [Online]. Available: [cartoolcommunity.unige.ch](http://cartoolcommunity.unige.ch).
- 822 123. Grave de Peralta Menendez, R., Murray, M. M., Michel, C. M., Martuzzi, R. & Gonzalez  
823 Andino, S. L. Electrical neuroimaging based on biophysical constraints. *Neuroimage* **21**, 527–  
824 539 (2004).
- 825 124. Michel, C. M. & Brunet, D. EEG Source Imaging: A Practical Review of the Analysis Steps.  
826 *Front. Neurol.* **10**, 325 (2019).

- 827 125. Spinelli, L., Andino, S. G., Lantz, G., Seeck, M. & Michel, C. M. Electromagnetic Inverse  
828 Solutions in Anatomically Constrained Spherical Head Models. *Brain Topogr.* **13**, 115–125  
829 (2000).
- 830 126. Tzourio-Mazoyer, N. *et al.* Automated Anatomical Labeling of Activations in SPM Using a  
831 Macroscopic Anatomical Parcellation of the MNI MRI Single-Subject Brain. *Neuroimage* **15**,  
832 273–289 (2002).
- 833 127. Rubega, M. *et al.* Estimating EEG Source Dipole Orientation Based on Singular-value  
834 Decomposition for Connectivity Analysis. *Brain Topogr.* 1–16 (2018). doi:10.1007/s10548-  
835 018-0691-2
- 836 128. Rubega M., Pascucci D., R e Queralt J., Van Mierlo P., Hagmann P., Plomp G., M. C. M. Time-  
837 varying effective EEG source connectivity: The optimization of model parameters. in *41st*  
838 *Annual International Conference of the IEEE Engineering in Medicine and Biology Society*  
839 *(EMBC), IEEE* (2019).
- 840 129. Takahashi, D. Y., Baccal , L. A. & Sameshima, K. Information theoretic interpretation of  
841 frequency domain connectivity measures. *Biol. Cybern.* **103**, 463–469 (2010).
- 842 130. Sameshima, K., Baccala, L. A. & Baccala, L. A. *Methods in Brain Connectivity Inference through*  
843 *Multivariate Time Series Analysis.* **20145078**, (CRC Press, 2014).
- 844 131. Vettoretti, M., Facchinetti, A., Sparacino, G. & Cobelli, C. Type-1 Diabetes Patient Decision  
845 Simulator for In Silico Testing Safety and Effectiveness of Insulin Treatments. *IEEE Trans.*  
846 *Biomed. Eng.* **65**, 1281–1290 (2018).
- 847 132. Man, C. D. *et al.* The UVA/PADOVA Type 1 Diabetes Simulator. *J. Diabetes Sci. Technol.* **8**, 26–  
848 34 (2014).
- 849 133. [Online]. Available: <http://www.brain-connectivity-toolbox.net>.
- 850 134. Bullmore, E. & Sporns, O. The economy of brain network organization. *Nat. Rev. Neurosci.* **13**,  
851 336–349 (2012).
- 852 135. Latora, V. & Marchiori, M. Efficient Behavior of Small-World Networks. *Phys. Rev. Lett.* **87**,  
853 198701 (2001).
- 854 136. Watts, D. J., Strogatz, S. H. Collective dynamics of ‘small-world’ networks. *Nature* **393**, 440–

855 442 (1998).

856 137. Fagiolo, G. Clustering in complex directed networks. *Phys. Rev. E* **76**, 026107 (2007).

857 138. Babiloni, F. *et al.* Estimation of the cortical functional connectivity with the multimodal  
858 integration of high-resolution EEG and fMRI data by directed transfer function. *Neuroimage*  
859 **24**, 118–131 (2005).

860 139. Bazire Stephen. *Benzodiazepine equivalent doses. Psychotropic Drug Directory.* (Lloyd-  
861 Reinhold Communications, 2014).

862

863

## 864 **Acknowledgments**

865 This study was supported by the European Union Horizon 2020 research and innovation  
866 program under the Marie Skłodowska-Curie grant agreement No. 739939, by Ministry of  
867 Health, Czech Republic - conceptual development of research organization (University  
868 Hospital Brno - FNBr, 65269705), by the Swiss National Science Foundation (grant No.  
869 320030\_184677), and by the National Centre of Competence in Research (NCCR)  
870 “SYNAPSY–The Synaptic Basis of Mental Diseases” (NCCR Synapsy Grant # “51NF40 –  
871 185897). CMM and MR were supported by the Swiss National Science Foundation (Sinergia  
872 project CRSII5\_170873). The funding sources had no role in the design, collection, analysis,  
873 or interpretation of the study. The authors wish to thank Martin Seeber, Patrik Wahlberg, David  
874 Pascucci, and Gijs Plomp for providing useful comments on the manuscript.

875

## 876 **Author Contributions**

877 AD – designed the study, performed the preprocessing, and wrote the initial draft; RB and JH  
878 – were responsible for patient recruitment and clinical assessment; EH – collected the EEG  
879 data; SF and ŠO – were involved in the clinical assessment; CMM – served as an advisor, MR  
880 – performed the analysis, wrote the initial draft, and was responsible for the overall oversight  
881 of the study. All authors revised the manuscript.

882

## 883 **Competing Interests**

884 The authors declare no competing interests.



885

886 **Table legends**

887 Table 1. <sup>a</sup>Education was classified into three levels: 1 = no high school, 2 = high school, 3 =  
888 university studies

889 Table 2. F31.3 - Bipolar affective disorder, current episode mild or moderate depression; F31.4  
890 - Bipolar affective disorder, current episode severe depression without psychotic symptoms;  
891 F31.5 - Bipolar affective disorder, current episode severe depression with psychotic symptoms;  
892 F32.1 - Moderate depressive episode; F32.2 - Severe depressive episode without psychotic  
893 symptoms; F32.3 - Severe depressive episode with psychotic symptoms; F33.1 - Recurrent  
894 depressive disorder, current episode moderate; F33.2 - Recurrent depressive disorder, current  
895 episode severe without psychotic symptoms; F33.3 - Recurrent depressive disorder, current  
896 episode severe with psychotic symptoms; BZD: benzodiazepine equivalent dose <sup>139</sup> AD -  
897 antidepressants (mirtazapine, citalopram, venlafaxine, vortioxetine, sertraline, trazodone); AP  
898 - antipsychotics (risperidone, olanzapine, quetiapine, amisulpride, aripiprazole); MS - mood  
899 stabilizers (valproate, lamotrigine, carbamazepine); AD/AP/MS medication scale: 1 – one  
900 medication in sub-therapeutic doses, 2 – one medication in therapeutic doses, 3 – combination  
901 of medications with one in therapeutic doses, 4 – combination of medications with more than  
902 one in therapeutic doses; MADRS (Montgomery–Åsberg Depression Rating Scale): score is  
903 between 0 and 60, the higher the score the higher the depressive symptom severity; CGI  
904 (Clinical Global Impression scale): healthy (1) – most extremely ill (7). Four patients were  
905 undergoing the first (patient 3) and second (patient 4 and 9) week of electroconvulsive therapy  
906 and the first week of repetitive transcranial magnetic stimulation (patient 5). No clinical effect  
907 of these neurostimulation treatments was apparent.

908

909 **Table 1. Demographic data**

| Characteristic                     | Patients<br>(n = 26) | Controls<br>(n = 25) | <i>t</i> -value | df | p-<br>value |
|------------------------------------|----------------------|----------------------|-----------------|----|-------------|
| Age: mean ± SD                     | 51.9 ± 9.1           | 49.5 ± 8.7           | 0.97            | 49 | 0.34        |
| Gender: female, <i>n</i>           | 11                   | 10                   |                 |    |             |
| Education <sup>a</sup> : mean ± SD | 1.9 ± 0.9            | 2.3 ± 0.7            | -1.70           | 49 | 0.10        |

910

911

912 Table 2. Patient characteristics

| Patient | ICD-10 diagnose | Number of episodes | Illness duration (years) | MADRS score | CGI score | BZD  | ADP/AP/MS  | AD/AP/MS medication scale |
|---------|-----------------|--------------------|--------------------------|-------------|-----------|------|------------|---------------------------|
| 1       | F31.4           | 3                  | 2                        | 27          | 4         | 2    | AD, AP, MS | 3                         |
| 2       | F32.2           | 1                  | 0.5                      | 24          | 5         | 0    | AD         | 2                         |
| 3       | F32.1           | 1                  | 1                        | 15          | 4         | 2    | AD         | 2                         |
| 4       | F31.5           | 5                  | 20                       | 39          | 6         | 0    | AP         | 2                         |
| 5       | F33.1           | 3                  | 7                        | 18          | 4         | 0    | AD         | 1                         |
| 6       | F33.1           | 2                  | 8                        | 9           | 3         | 1.33 | AD         | 1                         |
| 7       | F32.1           | 1                  | 1                        | 24          | 4         | 1.33 | AD, AP     | 3                         |
| 8       | F31.4           | 4                  | 27                       | 29          | 5         | 2    | AP         | 2                         |
| 9       | F33.3           | 2                  | 5                        | 36          | 6         | 1    | AD, AP     | 4                         |
| 10      | F33.1           | 3                  | 19                       | 21          | 4         | 1    | AD         | 1                         |
| 11      | F33.3           | 2                  | 2                        | 38          | 5         | 6    | AD, AP     | 4                         |
| 12      | F33.2           | 2                  | 1                        | 39          | 5         | 3    | AD, AP     | 4                         |
| 13      | F32.3           | 1                  | 0.08                     | 21          | 5         | 2    | AD, AP     | 4                         |
| 14      | F33.2           | 5                  | 21                       | 32          | 5         | 0    | AD, AP     | 3                         |
| 15      | F33.3           | 2                  | 2                        | 38          | 6         | 3    | AD, AP     | 4                         |
| 16      | F32.3           | 1                  | 0.08                     | 37          | 6         | 2    | AD, AP     | 4                         |
| 17      | F33.1           | 3                  | 4                        | 18          | 4         | 0    | AD, AP     | 4                         |
| 18      | F31.3           | 2                  | 16                       | 28          | 4         | 0    | AP, MS     | 4                         |
| 19      | F31.3           | 11                 | 24                       | 23          | 4         | 1    | AP, MS     | 4                         |
| 20      | F32.2           | 0                  | 0,17                     | 23          | 4         | 1    | AD, AP     | 4                         |
| 21      | F33.1           | 1                  | 9                        | 34          | 5         | 2    | AD         | 2                         |
| 22      | F32.3           | 0                  | 0,04                     | 37          | 6         | 1    | AD, AP     | 4                         |
| 23      | F33.3           | 1                  | 11                       | 49          | 6         | 3    | AD, AP     | 4                         |
| 24      | F33.1           | 3                  | 20                       | 23          | 4         | 0    | AD         | 2                         |
| 25      | F33.1           | 5                  | 24                       | 26          | 4         | 2    | AD, AP, MS | 4                         |
| 26      | F32.1           | 0                  | 0,17                     | 23          | 4         | 3    | AD, AP     | 3                         |

913

914 **Figure legends**

915 Figure 1 Parametric power spectral density (PSD) of the *population subjects* representing  
 916 controls (A) vs patients (B) in the subcortical regions of interest. Power significantly increases  
 917 within the interval [4-12] Hz (indicated with vertical dashed lines) in theta ([4-8] Hz) and alpha

918 ([8-12] Hz) bands and decreases in delta ([1-4] Hz) and beta ([12-18] Hz) bands in patients  
919 compared to controls ( $p < 0.05$ ) in the subcortical regions of interest. Continuous and dashed  
920 lines indicate the results for structures in the right and left hemispheres, respectively.

921 Figure 2 Boxplots to graphical illustrate the distribution of power of controls (green boxes) and  
922 patients (red boxes) in (a) [1-4] Hz, (b) [4-12] Hz and (c) [12-18] Hz. One star (\*) stands for  
923 significant statistical difference with  $p < 0.05$  and two stars (\*\*) for  $p < 0.001$ . Power in [4-12]  
924 Hz significantly increases in patients compared to controls in all examined anatomical brain  
925 structures.

926 Figure 3 Local efficiency computed in the two *population subjects* representing (a) controls  
927 and (b) patients. Note that all subcortical regions of interest (ROIs) revealed higher values for  
928 patients than controls corresponding to the same tendency observed in all ROIs of the brain at  
929 the *single-subject* level (see Supplementary Fig. S1 – S2 online). The efficiency for each ROI  
930 is represented by a sphere centered on the cortical region, whose radius is linearly related to  
931 the magnitude. Such information is also coded through a color scale.

932 Figure 4 Boxplots to graphically illustrate the distribution of (a) local efficiency, (b) clustering  
933 coefficient, (c) strength, and (d) outflow in controls (green boxes) and patients (red boxes).  
934 One star (\*) stands for significant statistical difference with  $p < 0.05$  and two stars (\*\*) for  
935  $p < 0.001$ . All network metrics that refer to the right amygdala significantly differ between  
936 controls and patients ( $p < 0.001$ ), applying the Bonferroni correction ( $p < 0.05/12 \rightarrow p < 0.0042$ ).

937 Figure 5 Relationship between the intake of antidepressants/antipsychotics/mood stabilizers  
938 (AD/AP/MS) and the global efficiency (GE). Note that higher medication intake is associated  
939 with lower GE. The orange dotted line stands for the predicted value of AD/AP/MS for each  
940 patient using GE as predictor. For values of the AD/AP/MS medication scale the reader is  
941 referred to the legend of Table 2.
